# Supplementary material for: A National Accessibility Audit of Primary Health Care Facilities in Brazil—Are People with Disabilities Being Denied Their Right to Health?
Source: PubMed Central journal article supplement (PMC7999795; doi:10.3390/ijerph18062953), 2021-03-13
Supplement: ijerph-18-02953-s001.pdf [file ijerph-18-02953-s001.pdf]

## Supplementary 1

Title S1: Formula for calculation of total accessibility score

The total accessibility score was calculated by the following formulas:

$$TAS = \frac{x - Min_x}{Max_x - Min_x} * 100 \quad (1)$$

$$x = \frac{x_{i,a} - Min_a}{Max_a - Min_a} + \frac{x_{i,b} - Min_b}{Max_b - Min_b} + \frac{x_{i,c} - Min_c}{Max_c - Min_c} \quad (2)$$

Where:

- TAS: Total Accessibility Score;
- $x_{i,a}$ : sum of unit  $i$ 's dummies variables for unit external infrastructure dimension;
- $x_{i,b}$ : sum of unit  $i$ 's dummies variables for unit's internal infrastructure dimension;
- $x_{i,c}$ : sum of unit  $i$ 's dummies variables for dimension Accessibility features of primary care facilities for people with visual or hearing disabilities;
- $Max_a$ : highest observed value of the sum of unit  $i$ 's dummies for the unit's external infrastructure dimension;
- $Min_a$ : lowest observed sum value of unit  $i$ 's dummies variables for unit external infrastructure dimension;
- $Max_b$ : highest observed value of the sum of unit  $i$ 's dummies for the unit's internal infrastructure dimension;
- $Min_b$ : lowest observed sum value of unit  $i$ 's dummies variables for unit's internal infrastructure dimension
- $Max_c$ : highest observed value of sum of unit  $i$ 's dummies for dimension Accessibility features of primary healthcare facilities for people with visual or hearing disabilities
- $Min_c$ : lowest observed value of sum of unit  $i$ 's dummies for dimension Accessibility features of primary healthcare facilities for people with visual or hearing disabilities.
